# Supplementary material for: Development of a high-throughput method to evaluate serum bactericidal activity using bacterial ATP measurement as survival readout
Source: PubMed Central journal article supplement (PMC5305226; doi:10.1371/journal.pone.0172163), 2017-02-13
Supplement: pone.0172163.s001.pdf [file pone.0172163.s001.pdf]

**S1 Table. Raw values and calculated span in luminescence and CFU/mL for data shown in Fig**

**1A.**

|      | <b>CFU/mL</b> | <b>CPS</b> | <b>span in<br/>CFU/mL</b> | <b>span in CPS</b> |
|------|---------------|------------|---------------------------|--------------------|
| T0   | 1.02E+03      | 0          | 1.98E+03                  | 91                 |
| T180 | 3.00E+03      | 91         |                           |                    |
| T0   | 6.27E+03      | 59         | 1.25E+04                  | 151                |
| T180 | 1.88E+04      | 210        |                           |                    |
| T0   | 2.16E+04      | 296        | 1.06E+05                  | 579                |
| T180 | 1.28E+05      | 875        |                           |                    |
| T0   | 1.41E+05      | 1145       | 1.06E+06                  | 4252               |
| T180 | 1.20E+06      | 5397       |                           |                    |
